# Supplementary material for: Compost and PGP-Based Biostimulant as Alternative to Peat and NPK Fertilization in Chestnut (Castanea Sativa Mill.) Nursery Production
Source: MDPI journal article supplement (doi:10.3390/f12070850), 2021-06-28
Supplement: s1 [file s1]

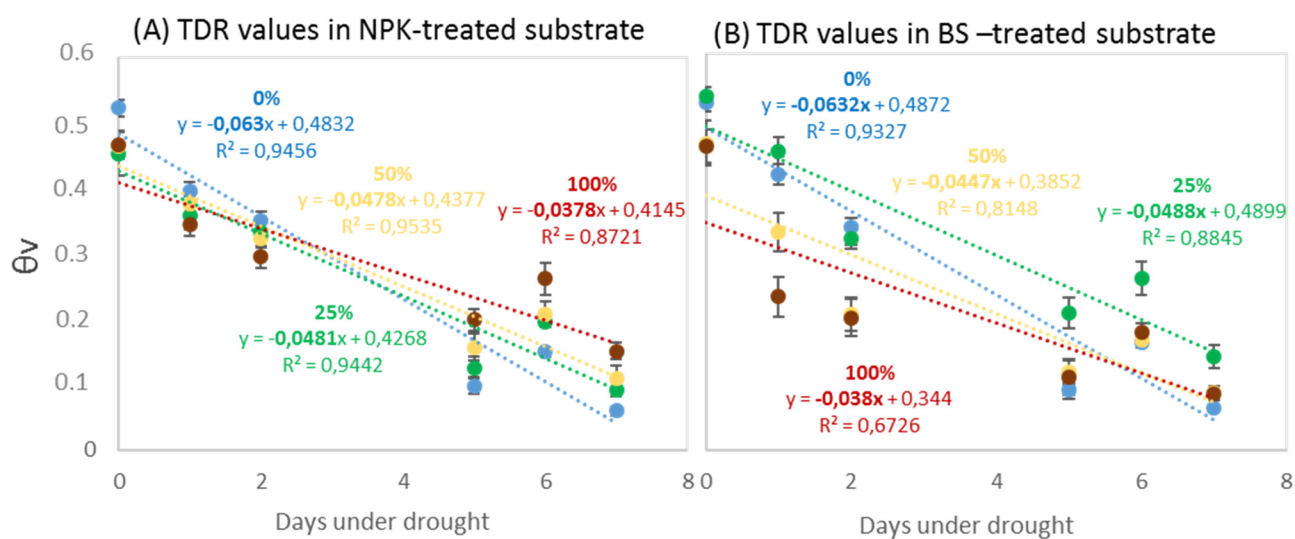

**Figure S1.** Lineal adjustments of TDR values of substrate mixtures along the water deficit experiment in NPK (A) and BS (B) treated chestnut plants. Blue 0%, green 25%, yellow 50%, brown 100%. ( $n = 6$ ).
